# Supplementary material for: Photocatalytic Degradation of Fluoroquinolone Antibiotics in Solution
Source: Preprints.org preprint supplement (doi:10.20944/preprints202201.0122.v1), 2022-01-10
Supplement: Supplementary file 2 [file supplementary]

Supplementary Information

Photocatalytic degradation of fluoroquinolone antibiotics in solution

Abniel Machín1*, Kenneth Fontánez2, José Duconge3, María Cotto3, Florian I. Petrescu4, Carmen Morant5,Francisco Márquez3*

1 Arecibo Observatory, Universidad Ana G. Méndez-Cupey Campus, 00926PR, United States

2 Department of Chemistry, University of Puerto Rico, Rio Piedras Campus, San Juan, 00925PR, United States

3 Nanomaterials Research Group, School of Natural Sciences and Technology, Universidad Ana G. Méndez-Gurabo Campus, 00778PR, United States

4 IFToMM-ARoTMM, Bucharest Polytechnic University, Bucharest, (CE), Romania

5 Department of Applied Physics, Autonomous University of Madrid and Instituto de Ciencia de Materiales Nicolas Cabrera, 28041, Spain

***** Correspondence: [fmarquez@uagm.edu](mailto:fmarquez@uagm.edu) (FM), [machina1@uagm.edu](mailto:machina1@uagm.edu) (AM)


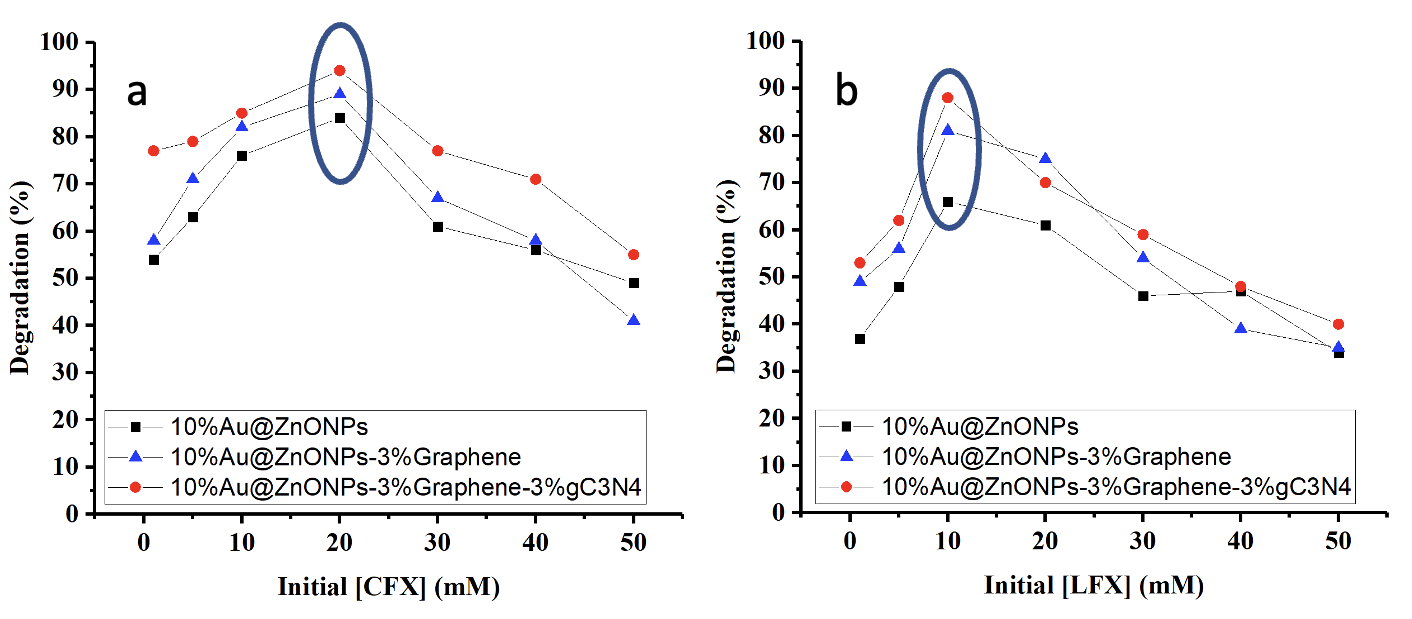


**Figure S1.** Evaluation of the initial concentration of CFX (a) and LFX (b) on the catalytic efficiency of 10%Au@ZnONPs, 10%Au@ZnONPs-3%rGO, and 10%Au@ZnONPs-3%rGO-3%gC3N4 in the photodegradation reaction.


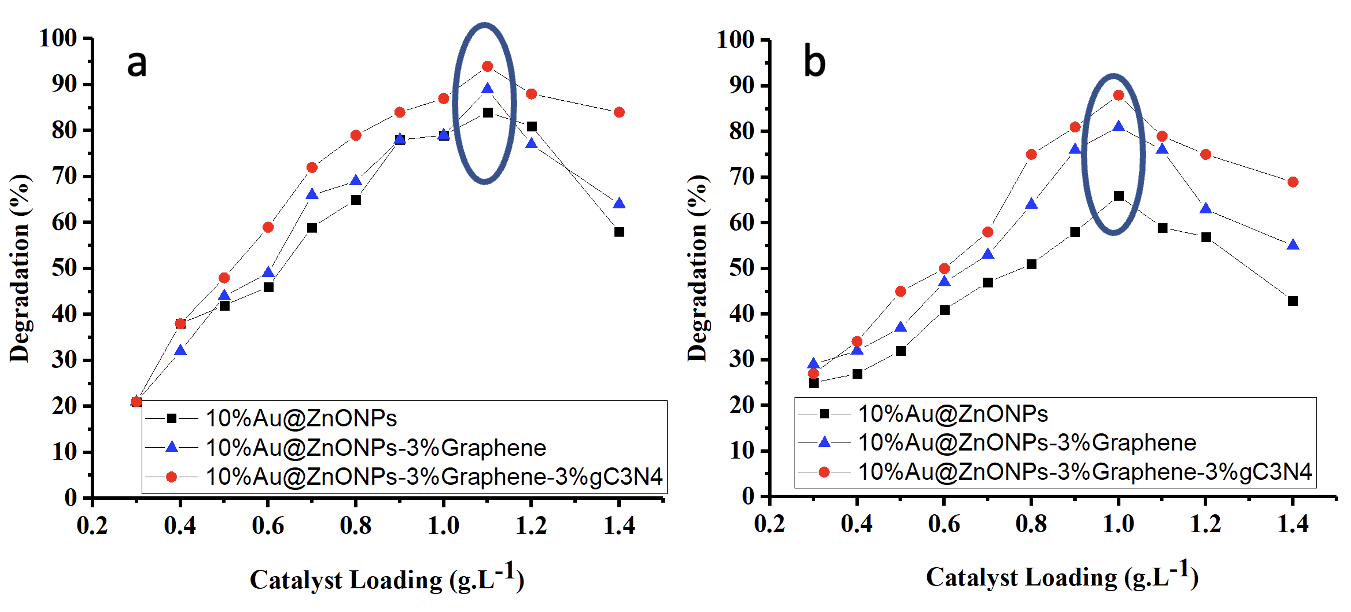


**Figure S2.** Evaluation of the initial concentration of 10%Au@ZnONPs, 10%Au@ZnONPs-3%rGO, and 10%Au@ZnONPs-3%rGO-3%gC3N4 on the efficiency of the photodegradation reaction of CFX (a) and LFX (b).


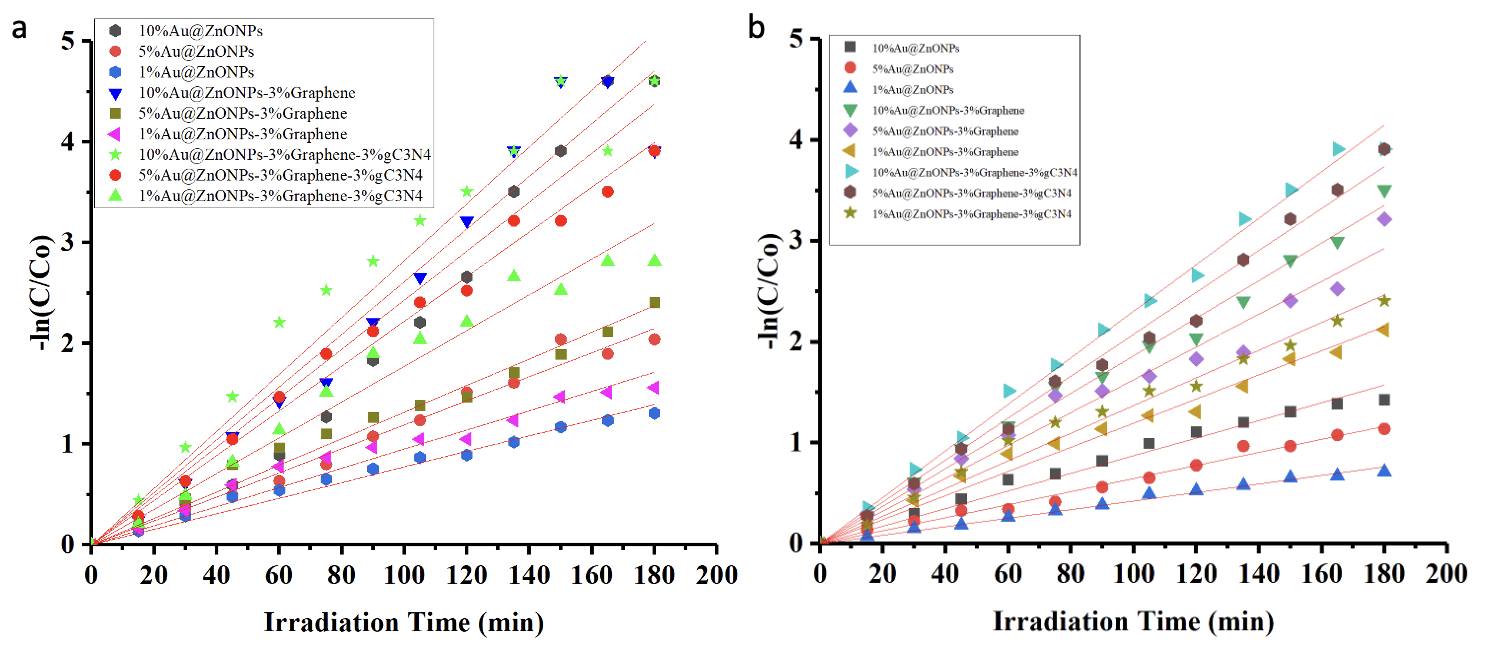


**Figure S3.** Pseudo-first order kinetics of photodegradation of CFX (a) and LFX (b) using different catalysts.


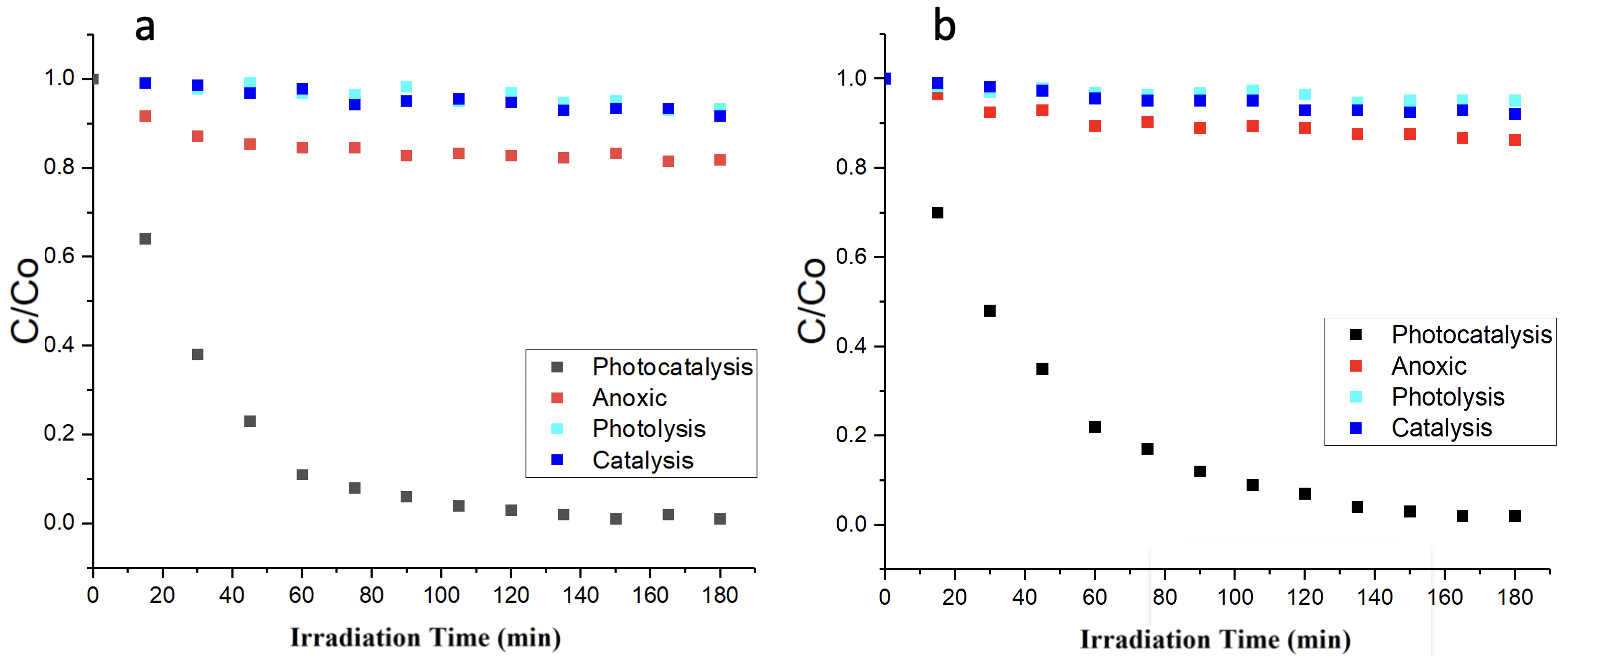


**Figure S4.** Control experiments for 10%Au@ZnONPs-3%rGO-3%gC3N4 with CFX (a) and LFX (b), under visible radiation.


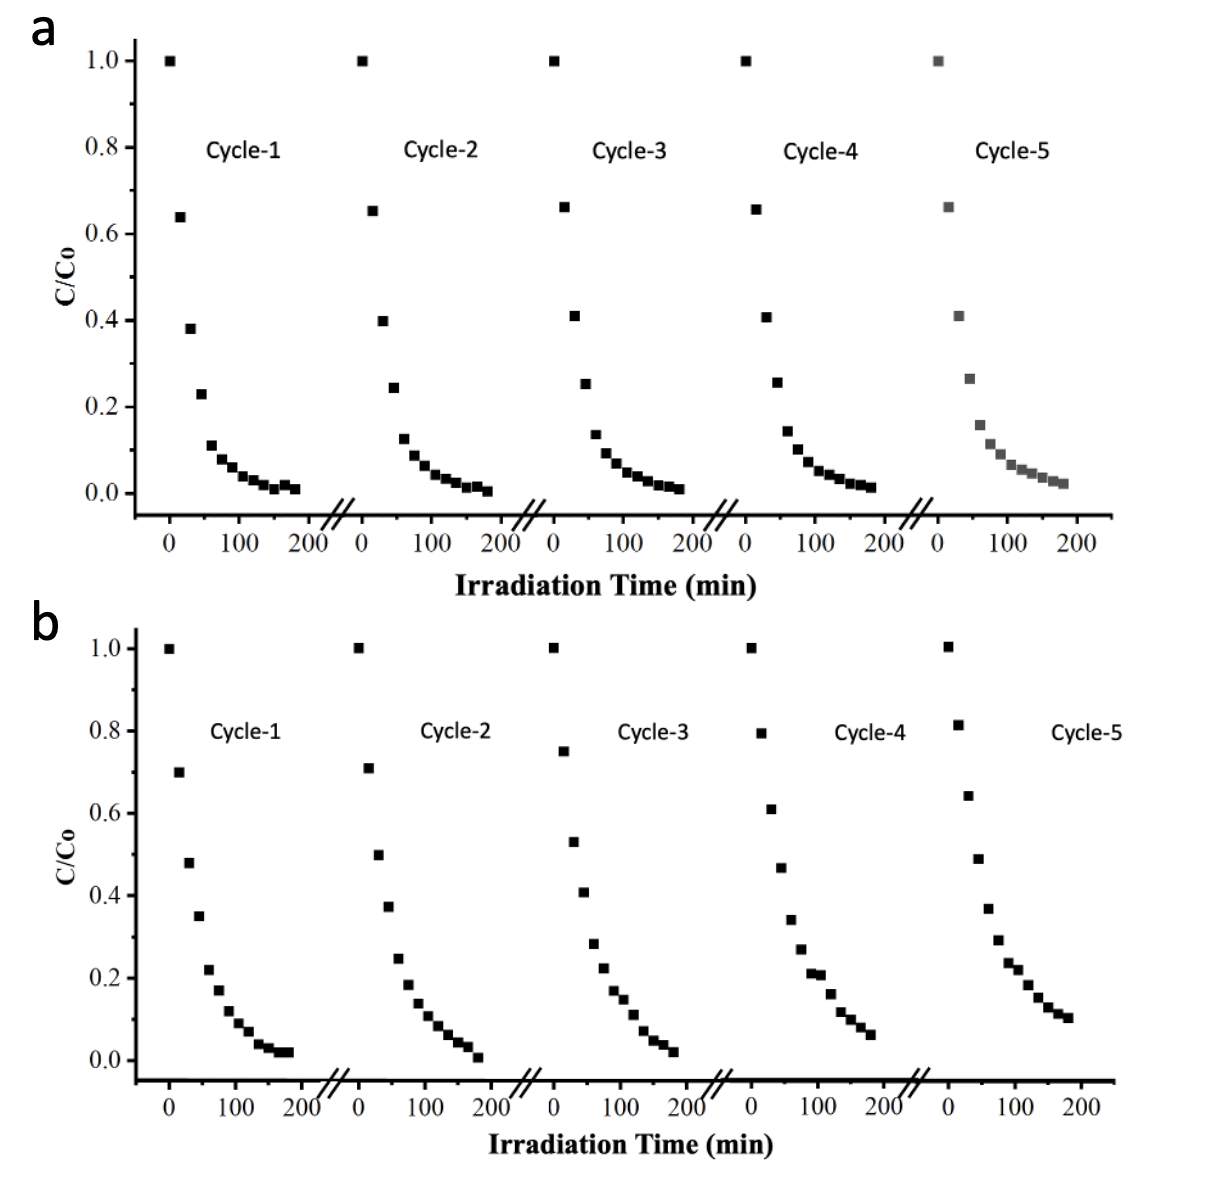


**Figure S5.** Recyclability of 10%Au@ZnONPs-3%rGO-3%gC3N4 after five consecutive catalytic cycles of photodegradation of CFX (a) and LFX (b) under visible radiation.


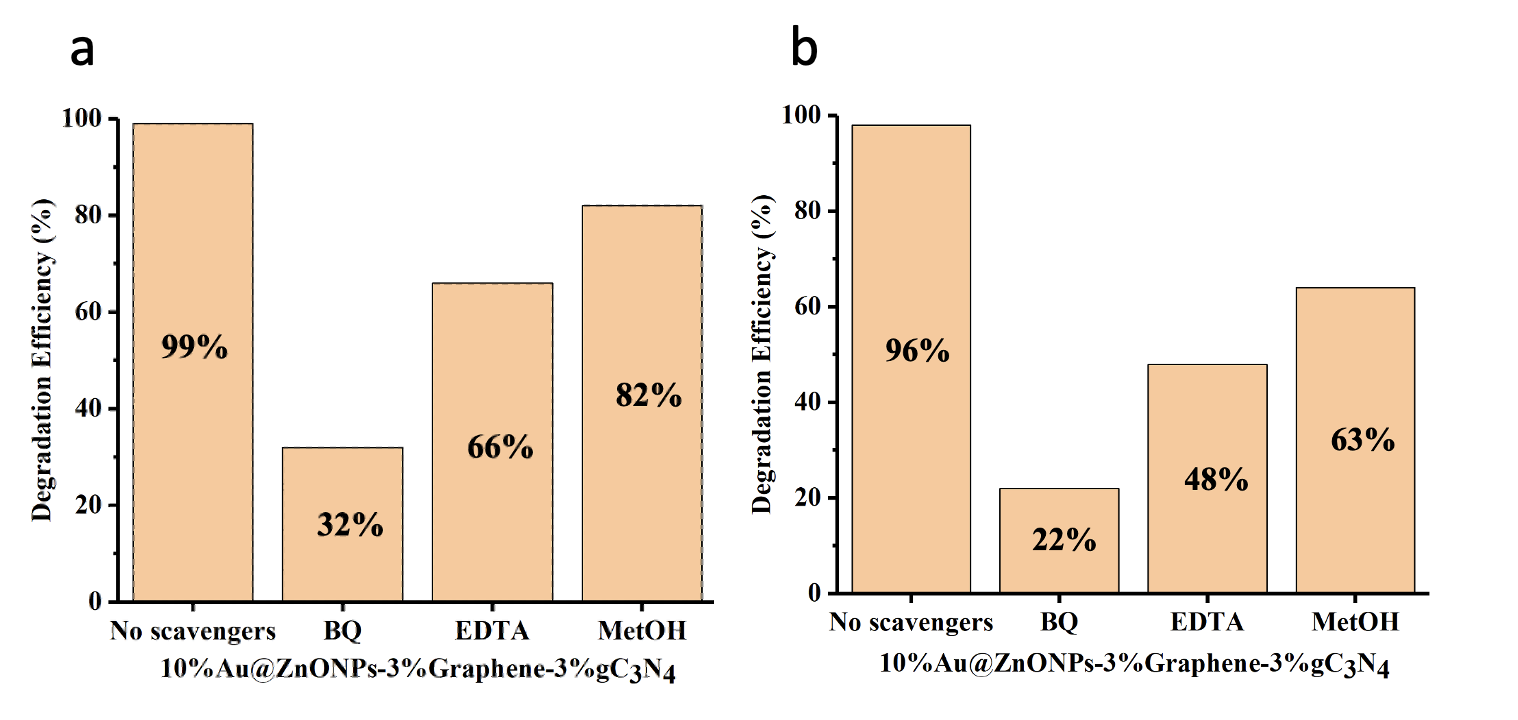


**Figure S6.** Photocatalytic activity of 10%Au@ZnONPs-3%rGO-3%gC3N4 on the degradation of CFX (a) and LFX (b) in the presence of various scavengers under visible radiation.

**Table S1.** The pseudo-first-order kinetics constants for the photodegradation of CFX and LFX.

| **Material** | Apparent rate CFX1 | Apparent rate LFX1 |
| --- | --- | --- |

| 1%Au@ZnONPs  5%Au@ZnONPs  10%Au@ZnONPs  1%Au@ZnONPs-3%rGO  5%Au@ZnONPs-3%rGO  10%Au@ZnONPs-3%rGO  1%Au@ZnONPs-3%rGO-3%gC3N4  5%Au@ZnONPs-3%rGO-3%gC3N4  10%Au@ZnONPs-3%rGO-3%gC3N4 | 0.008 0.004  0.012 0.006  0.026 0.009  0.009 0.011  0.013 0.016  0.024 0.019  0.018 0.014  0.022 0.021  0.028 0.023 |
| --- | --- |

1(*k*, min-1)
